# Supplementary material for: Long-Term Sevoflurane Exposure Inhibits The Proliferation, Differentiation, and Homing Potential of Bone Marrow Mesenchymal Stem Cells
Source: Research Square preprint supplement (doi:10.21203/rs.3.rs-218648/v1), 2021-03-09
Supplement: Supplementary file 1 [file 09e5f48815a1133da448b6c3.docx]

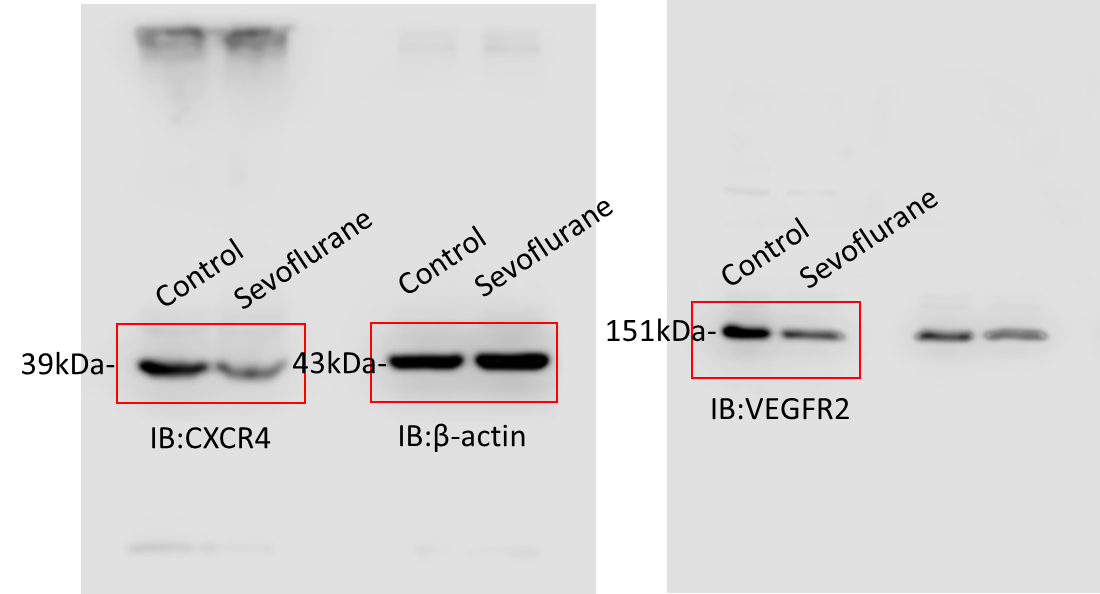


Fig. S1. Uncropped western blots – related to Figure 5. Immunoblot analysis of BMSCs in Control group or after long-term sevoflurane exposure. The same blots were probed with anti-CXCR4 (left panel), anti-VEGFR2 (right panel), and anti-β-actin (middle panel). Red square frames indicate the cropped regions shown in Fig. 5C.
